# Supplementary material for: Effects of Two Different Irrigation Systems on the Amino Acid Concentrations, Volatile Composition and Sensory Profiles of Godello Musts and Wines
Source: MDPI journal article supplement (doi:10.3390/foods8040135), 2019-04-22

**Supplementary Table S1.** Irrigation effects on the amino acid concentrations (mean  $\pm$  standard error, mg L<sup>-1</sup>) of Godello wines. The significances of the factors year and treatment, as well as their interaction are also shown. The concentration of proline is not considered for calculating the sum of amino acids. R = rain-fed, DI = drip irrigation, SDI = subsurface drip irrigation.

| Compound                           | 2012              |                   |                   | 2013                                |                                     |                                    | 2014                              |                                    |                                   | Treatment | Year | Treatment x Year |
|------------------------------------|-------------------|-------------------|-------------------|-------------------------------------|-------------------------------------|------------------------------------|-----------------------------------|------------------------------------|-----------------------------------|-----------|------|------------------|
|                                    | R                 | DI                | SDI               | R                                   | DI                                  | SDI                                | R                                 | DI                                 | SDI                               |           |      |                  |
| Aspartic acid                      | 12.2 $\pm$ 2.9    | 14.4 $\pm$ 3.2    | 12.1 $\pm$ 1.9    | 13.0 $\pm$ 0.6                      | 12.4 $\pm$ 0.5                      | 10.8 $\pm$ 0.5                     | 24.6 $\pm$ 5.2                    | 22.4 $\pm$ 2.4                     | 14.2 $\pm$ 0.4                    | ns        | **   | ns               |
| Glutamic acid                      | 1.7 $\pm$ 1.7     | 2.1 $\pm$ 0.4     | 2.5 $\pm$ 0.1     | 10.8 $\pm$ 1.1                      | 5.1 $\pm$ 4.6                       | 0.7 $\pm$ 0.5                      | 11.6 $\pm$ 2.3                    | 12.9 $\pm$ 0.4                     | 8.3 $\pm$ 0.7                     | ns        | ***  | ns               |
| Asparagine                         | 2.8 $\pm$ 1.1     | 4.5 $\pm$ 1.5     | 3.1 $\pm$ 0.1     | 7.7 $\pm$ 0.6                       | 7.7 $\pm$ 0.0                       | 6.0 $\pm$ 0.2                      | 12.2 $\pm$ 4.6                    | 12.3 $\pm$ 0.6                     | 7.6 $\pm$ 0.7                     | ns        | ***  | ns               |
| Serine                             | 3.1 $\pm$ 1.0     | 3.0 $\pm$ 0.5     | 2.4 $\pm$ 0.2     | <b>4.1 <math>\pm</math> 0.2 b</b>   | <b>4.1 <math>\pm</math> 0.0 b</b>   | <b>3.2 <math>\pm</math> 0.0 a</b>  | <b>5.9 <math>\pm</math> 0.4 b</b> | <b>5.2 <math>\pm</math> 0.1 b</b>  | <b>3.8 <math>\pm</math> 0.1 a</b> | **        | ***  | ns               |
| Glutamine                          | 0.2 $\pm$ 0.1     | 0.4 $\pm$ 0.1     | 0.2 $\pm$ 0.0     | 0.6 $\pm$ 0.0                       | 0.6 $\pm$ 0.0                       | 0.4 $\pm$ 0.1                      | 0.6 $\pm$ 0.1                     | 0.6 $\pm$ 0.0                      | 0.3 $\pm$ 0.0                     | *         | **   | ns               |
| Histidine                          | 2.8 $\pm$ 0.7     | 4.2 $\pm$ 1.0     | 3.3 $\pm$ 0.8     | 5.9 $\pm$ 0.6                       | 4.2 $\pm$ 1.4                       | 4.0 $\pm$ 0.6                      | 5.9 $\pm$ 1.0                     | 6.1 $\pm$ 0.2                      | 4.2 $\pm$ 0.0                     | ns        | *    | ns               |
| Glycine                            | 3.6 $\pm$ 0.5     | 4.1 $\pm$ 0.5     | 3.1 $\pm$ 0.4     | <b>4.2 <math>\pm</math> 0.4 b</b>   | <b>3.5 <math>\pm</math> 0.5 b</b>   | <b>2.3 <math>\pm</math> 0.1 a</b>  | <b>3.8 <math>\pm</math> 0.2 b</b> | <b>3.1 <math>\pm</math> 0.2 b</b>  | <b>2.3 <math>\pm</math> 0.0 a</b> | **        | ns   | ns               |
| Threonine                          | 2.1 $\pm$ 0.6     | 2.1 $\pm$ 0.5     | 1.9 $\pm$ 0.2     | 2.2 $\pm$ 0.2                       | 2.4 $\pm$ 0.1                       | 2.1 $\pm$ 0.0                      | <b>3.5 <math>\pm</math> 0.1 b</b> | <b>2.9 <math>\pm</math> 0.2 ab</b> | <b>2.3 <math>\pm</math> 0.1 a</b> | ns        | **   | ns               |
| Arginine                           | 4.3 $\pm$ 2.3     | 5.3 $\pm$ 1.7     | 4.6 $\pm$ 0.5     | 7.1 $\pm$ 1.0                       | 7.5 $\pm$ 0.3                       | 6.1 $\pm$ 0.2                      | 8.7 $\pm$ 1.6                     | 8.0 $\pm$ 0.6                      | 5.9 $\pm$ 0.1                     | ns        | **   | ns               |
| Alanine                            | 7.9 $\pm$ 3.2     | 6.8 $\pm$ 1.9     | 5.0 $\pm$ 0.3     | 7.7 $\pm$ 0.5                       | 7.6 $\pm$ 0.1                       | 6.3 $\pm$ 0.1                      | 9.4 $\pm$ 2.3                     | 8.5 $\pm$ 0.5                      | 6.4 $\pm$ 0.6                     | ns        | ns   | ns               |
| $\gamma$ -Aminobutyric acid (GABA) | 5.4 $\pm$ 3.8     | 4.0 $\pm$ 1.2     | 2.8 $\pm$ 0.0     | 8.4 $\pm$ 0.8                       | 7.8 $\pm$ 0.2                       | 6.1 $\pm$ 0.4                      | 10.8 $\pm$ 7.5                    | 8.0 $\pm$ 1.7                      | 3.1 $\pm$ 0.5                     | ns        | ns   | ns               |
| Proline                            | 379.8 $\pm$ 134.5 | 824.1 $\pm$ 222.4 | 489.4 $\pm$ 287.2 | 895.4 $\pm$ 297.9                   | 854.9 $\pm$ 377.8                   | 454.7 $\pm$ 251.6                  | 371.4 $\pm$ 344.6                 | 761.1 $\pm$ 111.5                  | 237.9 $\pm$ 203.6                 | ns        | ns   | ns               |
| Tyrosine                           | 2.3 $\pm$ 1.2     | 2.7 $\pm$ 0.9     | 2.2 $\pm$ 0.4     | <b>3.4 <math>\pm</math> 0.1 b</b>   | <b>3.6 <math>\pm</math> 0.1 b</b>   | <b>2.9 <math>\pm</math> 0.1 a</b>  | 0.9 $\pm$ 0.2                     | 0.9 $\pm$ 0.2                      | 0.9 $\pm$ 0.0                     | ns        | *    | ns               |
| Ammonium ion                       | 3.7 $\pm$ 1.0     | 5.1 $\pm$ 0.6     | 4.4 $\pm$ 0.7     | 4.8 $\pm$ 0.7                       | 4.2 $\pm$ 0.2                       | 3.9 $\pm$ 0.5                      | 6.0 $\pm$ 1.4                     | 5.9 $\pm$ 0.4                      | 4.6 $\pm$ 0.4                     | ns        | ns   | ns               |
| Valine                             | 3.8 $\pm$ 2.4     | 4.2 $\pm$ 1.6     | 3.0 $\pm$ 0.2     | 6.5 $\pm$ 0.1                       | 7.1 $\pm$ 0.3                       | 5.6 $\pm$ 0.4                      | <b>9.3 <math>\pm</math> 0.2 b</b> | <b>6.5 <math>\pm</math> 0.7 ab</b> | <b>4.2 <math>\pm</math> 0.9 a</b> | ns        | **   | ns               |
| Methionine                         | 1.4 $\pm$ 0.6     | 1.6 $\pm$ 0.5     | 1.3 $\pm$ 0.1     | 1.6 $\pm$ 0.0                       | 1.5 $\pm$ 0.1                       | 1.2 $\pm$ 0.1                      | 3.1 $\pm$ 0.4                     | 2.7 $\pm$ 0.2                      | 1.8 $\pm$ 0.0                     | ns        | **   | ns               |
| Cysteine                           | 0.0 $\pm$ 0.0     | 0.0 $\pm$ 0.0     | 0.0 $\pm$ 0.0     | 0.4 $\pm$ 0.2                       | 0.0 $\pm$ 0.0                       | 0.0 $\pm$ 0.0                      | 0.0 $\pm$ 0.0                     | 0.0 $\pm$ 0.0                      | 0.0 $\pm$ 0.0                     | ns        | ns   | ns               |
| Isoleucine                         | 1.8 $\pm$ 0.8     | 1.9 $\pm$ 0.5     | 1.4 $\pm$ 0.0     | 2.5 $\pm$ 0.0                       | 2.7 $\pm$ 0.0                       | 2.1 $\pm$ 0.3                      | <b>3.9 <math>\pm</math> 0.2 b</b> | <b>2.8 <math>\pm</math> 0.3 ab</b> | <b>2.0 <math>\pm</math> 0.3 a</b> | *         | **   | ns               |
| Tryptophan                         | 1.1 $\pm$ 0.2     | 1.1 $\pm$ 0.1     | 1.2 $\pm$ 0.0     | 0.6 $\pm$ 0.2                       | 0.7 $\pm$ 0.1                       | 0.5 $\pm$ 0.0                      | 0.9 $\pm$ 0.1                     | 1.0 $\pm$ 0.1                      | 0.8 $\pm$ 0.0                     | ns        | ns   | ns               |
| Leucine                            | 5.2 $\pm$ 3.1     | 5.9 $\pm$ 2.1     | 4.2 $\pm$ 0.2     | 8.3 $\pm$ 0.5                       | 8.5 $\pm$ 0.1                       | 7.0 $\pm$ 0.0                      | <b>12.1 <math>\pm</math> 1.6b</b> | <b>9.8 <math>\pm</math> 0.8ab</b>  | <b>6.3 <math>\pm</math> 0.4a</b>  | ns        | **   | ns               |
| Phenylalanine                      | 3.6 $\pm$ 2.0     | 4.0 $\pm$ 1.3     | 3.0 $\pm$ 0.1     | 5.0 $\pm$ 0.3                       | 5.3 $\pm$ 0.3                       | 4.7 $\pm$ 0.0                      | 7.7 $\pm$ 1.3                     | 6.7 $\pm$ 0.5                      | 4.3 $\pm$ 0.3                     | ns        | **   | ns               |
| Ornithine                          | 0.9 $\pm$ 0.4     | 0.6 $\pm$ 0.1     | 0.7 $\pm$ 0.3     | 0.5 $\pm$ 0.0                       | 0.6 $\pm$ 0.0                       | 0.7 $\pm$ 0.1                      | 0.9 $\pm$ 0.4                     | 1.2 $\pm$ 0.3                      | 1.8 $\pm$ 0.8                     | ns        | ns   | ns               |
| Lysine                             | 6.0 $\pm$ 3.2     | 8.3 $\pm$ 2.9     | 7.1 $\pm$ 1.1     | 11.2 $\pm$ 1.5                      | 11.7 $\pm$ 0.3                      | 9.1 $\pm$ 0.0                      | 15.1 $\pm$ 2.8                    | 12.8 $\pm$ 1.0                     | 8.1 $\pm$ 0.0                     | ns        | **   | ns               |
| Sum of amino acids                 | 72.5 $\pm$ 30.8   | 81.2 $\pm$ 22.7   | 65.1 $\pm$ 5.9    | <b>111.8 <math>\pm</math> 5.1 b</b> | <b>104.5 <math>\pm</math> 5.4 b</b> | <b>81.8 <math>\pm</math> 0.3 a</b> | 150.8 $\pm$ 31.8                  | 134.3 $\pm$ 10.4                   | 88.5 $\pm$ 0.4                    | *         | **   | ns               |

Different letters indicate significant differences between treatments at  $p < 0.05$  for a given amino acid in a given year; for a rapid identification, these values appear in bold. The significance of the year, treatment and their interaction is expressed as ns = non-significant; \*  $p < 0.05$ ; \*\*  $p < 0.01$ ; \*\*\*  $p < 0.001$ .

**Supplementary Figure S1.** Visual and palate descriptors for Godello wines (averaged from 2012 to 2014) as a function of rain-fed and irrigation conditions. R = Rain-fed, DI = Drip irrigation, SDI = Subsurface drip irrigation.

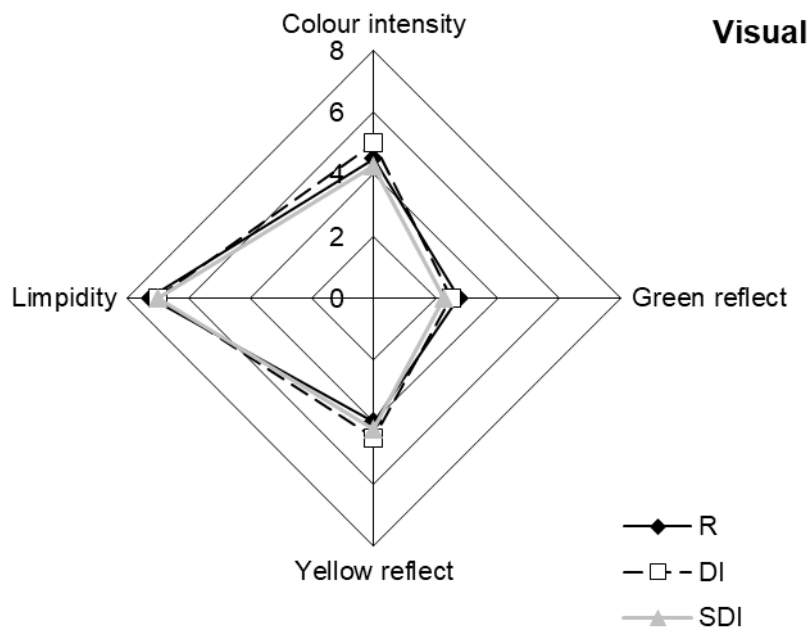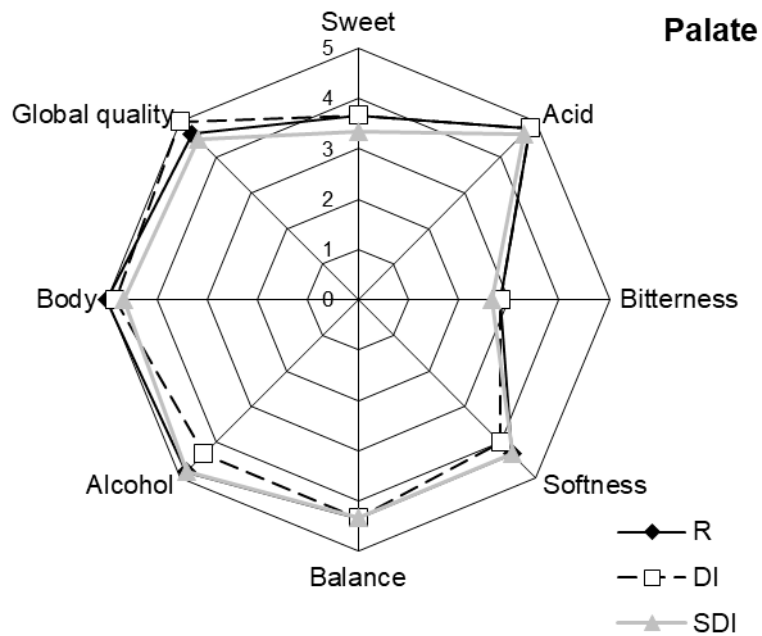

Supplement: s1 [file s1]
